# Supplementary material
Source: MDPI journal article supplement (https://www.mdpi.com/2227-7102/11/12/799)
Supplement: s1 [file s1]

## Survey

# Best teaching methods for online learning

Dr. Jodye Selco and Mariam Habbak are interested in your perspectives about online teaching methods. We would like for you to participate in this Institutional Review Board approved project (CPP IRB 20-134) by answering (anonymously) questions in this Google Form.

The survey will take you approximately 10 to 15 minutes to complete. There is no known or foreseeable risk to participating in this study. All results from this study will be treated with strict confidence and your privacy will be protected to the maximum extent possible. We will keep the information we collect from you for this study to use in future research/to share with other investigators to use in future studies without asking for your consent again. Information that could identify you will be removed from your research information so no one will know that it belongs to you.

Your participation in this study will benefit students and instructors throughout the university as it aims to enhance learning in online classes.

Your participation in this project is voluntary, and you may choose to not participate in this study (even if you answer the survey questions). At any time during this study, you may choose to refuse or discontinue your participation without any penalty. While unlikely, if any question posed makes you feel uncomfortable, you may choose not to answer it.

If you have any questions about your rights as a subject or participant, complaints about the informed consent process of this research study, experience an adverse event (something goes wrong), believe this study poses a risk, or you would like to raise a concern without feeling at risk of retaliation, please contact the Research Compliance Office within Cal Poly Pomona's Office of Research at 909.869.4215 or email [irb-office@cpp.edu](mailto:irb-office@cpp.edu). If you have concerns or questions about this study, please contact Mariam Habbak.

Principle Investigators or Researchers:

Dr. Jodye Selco, Professor, [jiselco@cpp.edu](mailto:jiselco@cpp.edu)

Mariam Habbak, Undergraduate Student, [habbak@cpp.edu](mailto:habbak@cpp.edu)

\* Required

1. Please choose your participation response: \*

*Mark only one oval.*

- ☐ Yes – I agree to participate in this study and give my permission to potentially publish my responses.  
*Skip to question 2*
- ☐ Partial – I want to provide information, but do not give my permission to potentially publish my responses. *Skip to question 2*
- ☐ No – I decline to participate in this study.

### General Information

2. Are you an undergraduate or graduate student?

*Mark only one oval.*

- ☐ Undergraduate  
☐ Graduate

3. Select your college(s). Select both for major and minor or double major.

*Check all that apply.*

- ☐ Don B. Huntley College of Agriculture  
☐ College of Business Administration  
☐ College of Education & Integrative Studies  
☐ College of Engineering  
☐ College of Environmental Design  
☐ College of Extended University  
☐ The Collins College of Hospitality Management  
☐ College of Letters, Arts, and Social Sciences  
☐ College of Science  
☐ Undeclared

4. Which describes your academic standing?

*Mark only one oval.*

- ☐ Freshman  
☐ Incoming transfer  
☐ Sophomore  
☐ Junior  
☐ Senior  
☐ Other: \_\_\_\_\_

5. What is your current/intended major?

---

6. Which of the following are important to your academic success?

*Check all that apply.*

☐ Interaction with faculty and staff

☐ Interaction with classmates

☐ Connecting with the campus community

Other: ☐ \_\_\_\_\_

7. Have you taken classes at the CPP campus?

*Mark only one oval.*

☐ Yes

☐ No

8. Do you feel part of the campus community?

*Mark only one oval.*

☐ Yes

☐ No

9. Which best describes your experience adjusting to online courses?

*Mark only one oval.*

☐ Easy

☐ Moderate

☐ Difficult

10. How effective is your overall experience with IN-PERSON courses?

*Mark only one oval.*

|               |                       |                       |                       |                       |                       |                |
|---------------|-----------------------|-----------------------|-----------------------|-----------------------|-----------------------|----------------|
|               | 1                     | 2                     | 3                     | 4                     | 5                     |                |
| Not effective | <input type="radio"/> | Very effective |

11. How effective is your overall experience with VIRTUAL courses?

*Mark only one oval.*

|               |                       |                       |                       |                       |                       |                |
|---------------|-----------------------|-----------------------|-----------------------|-----------------------|-----------------------|----------------|
|               | 1                     | 2                     | 3                     | 4                     | 5                     |                |
| Not effective | <input type="radio"/> | Very effective |

12. Are you familiar with Blackboard?

*Mark only one oval.*

☐ Yes

☐ No

13. Did you experience a sudden shift to online classes in Spring 2020 due to COVID-19?

*Mark only one oval.*

☐ Yes      *Skip to question 14*

☐ No      *Skip to question 19*

Spring 2020 Online Experience

14. Select all that describe the courses you took in Spring 2020.

*Check all that apply.*

- ☐ Major core courses
- ☐ Upper division courses
- ☐ Lower division courses
- ☐ General education courses
- ☐ High school courses (freshman)

15. What was the worst/hardest aspect of switching to virtual learning in Spring 2020?

---

---

---

---

---

16. What was the best aspect of virtual learning in Spring 2020?

---

---

---

---

---

17. Has virtual learning improved this semester?

*Mark only one oval.*

- ☐ Yes
- ☐ No

18. If you would like to elaborate on your Spring 2020 virtual experience or how it has improved, please do so here:

---

---

---

---

---

#### Fall 202 Online Experience

19. Did you receive instructions on how to access course materials at the beginning of this semester?

*Mark only one oval.*

- ☐ Yes      *Skip to question 20*  
☐ No      *Skip to question 22*

#### Course Instructions

20. How helpful were the instructions you received?

*Mark only one oval.*

- ☐ Not helpful  
☐ Somewhat helpful  
☐ Very helpful

21. How could the instructions be improved?

---

---

---

---

---

#### Teaching Methods

22. Which of the following do you feel are effective IN-PERSON teaching methods for LECTURE courses?

*Check all that apply.*

- ☐ Lecturing
- ☐ Class discussions
- ☐ Small group discussions
- ☐ Group assignments
- ☐ Active learning (doing independent work and previewing questions before class discussions)
- ☐ Active involvement during class time
- ☐ Flipped class (watching lecture independently and then using class time to further discuss the material and practice with examples)
- ☐ Assigned readings to introduce content before lesson

Other: ☐ \_\_\_\_\_

23. Which of the following do you feel are effective VIRTUAL teaching methods for LECTURE courses?

*Check all that apply.*

- ☐ Synchronous (live online classes)
- ☐ Asynchronous (material provided ahead of time and can be completed at any time)
- ☐ Lecturing
- ☐ Class discussions
- ☐ Small group discussions
- ☐ Group assignments
- ☐ Active learning (doing independent work and previewing questions before class discussions)
- ☐ Active involvement during class time
- ☐ Flipped class (watching lecture independently and then using class time to further discuss the material and practice with examples)
- ☐ Inquiry/discovery-based learning (trying to understand the material independently)
- ☐ Assigned readings to introduce content before lesson

Other: ☐ \_\_\_\_\_

24. Which of the following do you feel are effective IN-PERSON teaching methods for LAB / ACTIVITY courses?

*Check all that apply.*

- ☐ Lecture followed by lab/activity
- ☐ Class discussions
- ☐ Small group discussions
- ☐ Group assignments
- ☐ Active learning (doing independent work and previewing questions before class discussions)
- ☐ Active involvement during class time
- ☐ Flipped class (watching lecture independently and then using class time to further discuss the material and practice with examples)
- ☐ Inquiry/discovery-based learning (trying to understand the material independently)
- ☐ Hands-on learning
- ☐ Video demonstrations

Other: ☐ \_\_\_\_\_



25. Which of the following do you feel are effective VIRTUAL teaching methods for LAB / ACTIVITIES courses?

*Check all that apply.*

- ☐ Lecture followed by lab/activity
- ☐ Synchronous (live online classes)
- ☐ Asynchronous (material provided ahead of time and can be completed at any time)
- ☐ Class discussions
- ☐ Small group discussions
- ☐ Group assignments
- ☐ Active learning (doing independent work and previewing questions before class discussions)
- ☐ Active involvement during class time
- ☐ Flipped class (watching lecture independently and then using class time to further discuss the material and practice with examples)
- ☐ Inquiry/discovery-based learning (trying to understand the material independently)
- ☐ Hands-on learning
- ☐ Video demonstrations

Other: ☐ \_\_\_\_\_

26. Does it make a difference to you whether or not your classmates have their videos on during live Zoom classes?

*Mark only one oval.*

- ☐ Yes, I prefer that my classmates have their videos on because it creates a sense of class community
- ☐ Yes, I prefer that videos are off because they are distracting
- ☐ No, I have no preference
- ☐ Other: \_\_\_\_\_

27. Have you taken a lab or activity course through virtual learning?

*Mark only one oval.*

☐ Yes      *Skip to question 28*

☐ No      *Skip to question 33*

#### Virtual Lab / Activity Courses

28. Which of the following describe the labs / activities you took online?

*Check all that apply.*

☐ Upper division

☐ Lower division

☐ Major courses

☐ GE courses

29. Briefly describe how your course was conducted.

---

---

---

---

---

30. Was hands-on learning incorporated?

*Mark only one oval.*

☐ Yes      *Skip to question 31*

☐ No      *Skip to question 33*

#### Hands-on Learning

31. Did hands-on learning help you better understand the course content?

*Mark only one oval.*

☐ Yes

☐ No

32. Give examples on how hands-on learning was incorporated.

---

---

---

---

---

#### Assessments

33. Which of the following are effective IN-PERSON methods of academic assessment?

*Check all that apply.*

☐ Take-home exams (open note and require in-depth thinking)

☐ Free-response assessments

☐ Multiple choice assessments

☐ Performance tasks (projects)

Other: ☐ \_\_\_\_\_

34. Which of the following are effective VIRTUAL methods of academic assessment?

*Check all that apply.*

- ☐ Free-response assessments
- ☐ Multiple choice assessments
- ☐ Performance tasks (projects)
- ☐ Open-note assessments
- ☐ Closed-note assessments

Other: ☐ \_\_\_\_\_

35. Does your instructor's ability to detect dishonesty/cheating affect your learning and academic performance?

*Mark only one oval.*

- ☐ Yes
- ☐ No

36. How does your instructor's ability to detect dishonesty/cheating affect your learning and academic performance?

---

---

---

---

---

Final Comments
